# Supplementary material for: Pattern of circulating SARS‐CoV‐2‐specific antibody‐secreting and memory B‐cell generation in patients with acute COVID‐19
Source: PubMed Central journal article supplement — Clin Transl Immunology. 2021 Jan 31;10(2):e1245. doi: 10.1002/cti2.1245 (PMC7848539; doi:10.1002/cti2.1245), 2021-01-31
Supplement: CTI2-10-e1245-s001.pdf [file CTI2-10-e1245-s001.pdf]

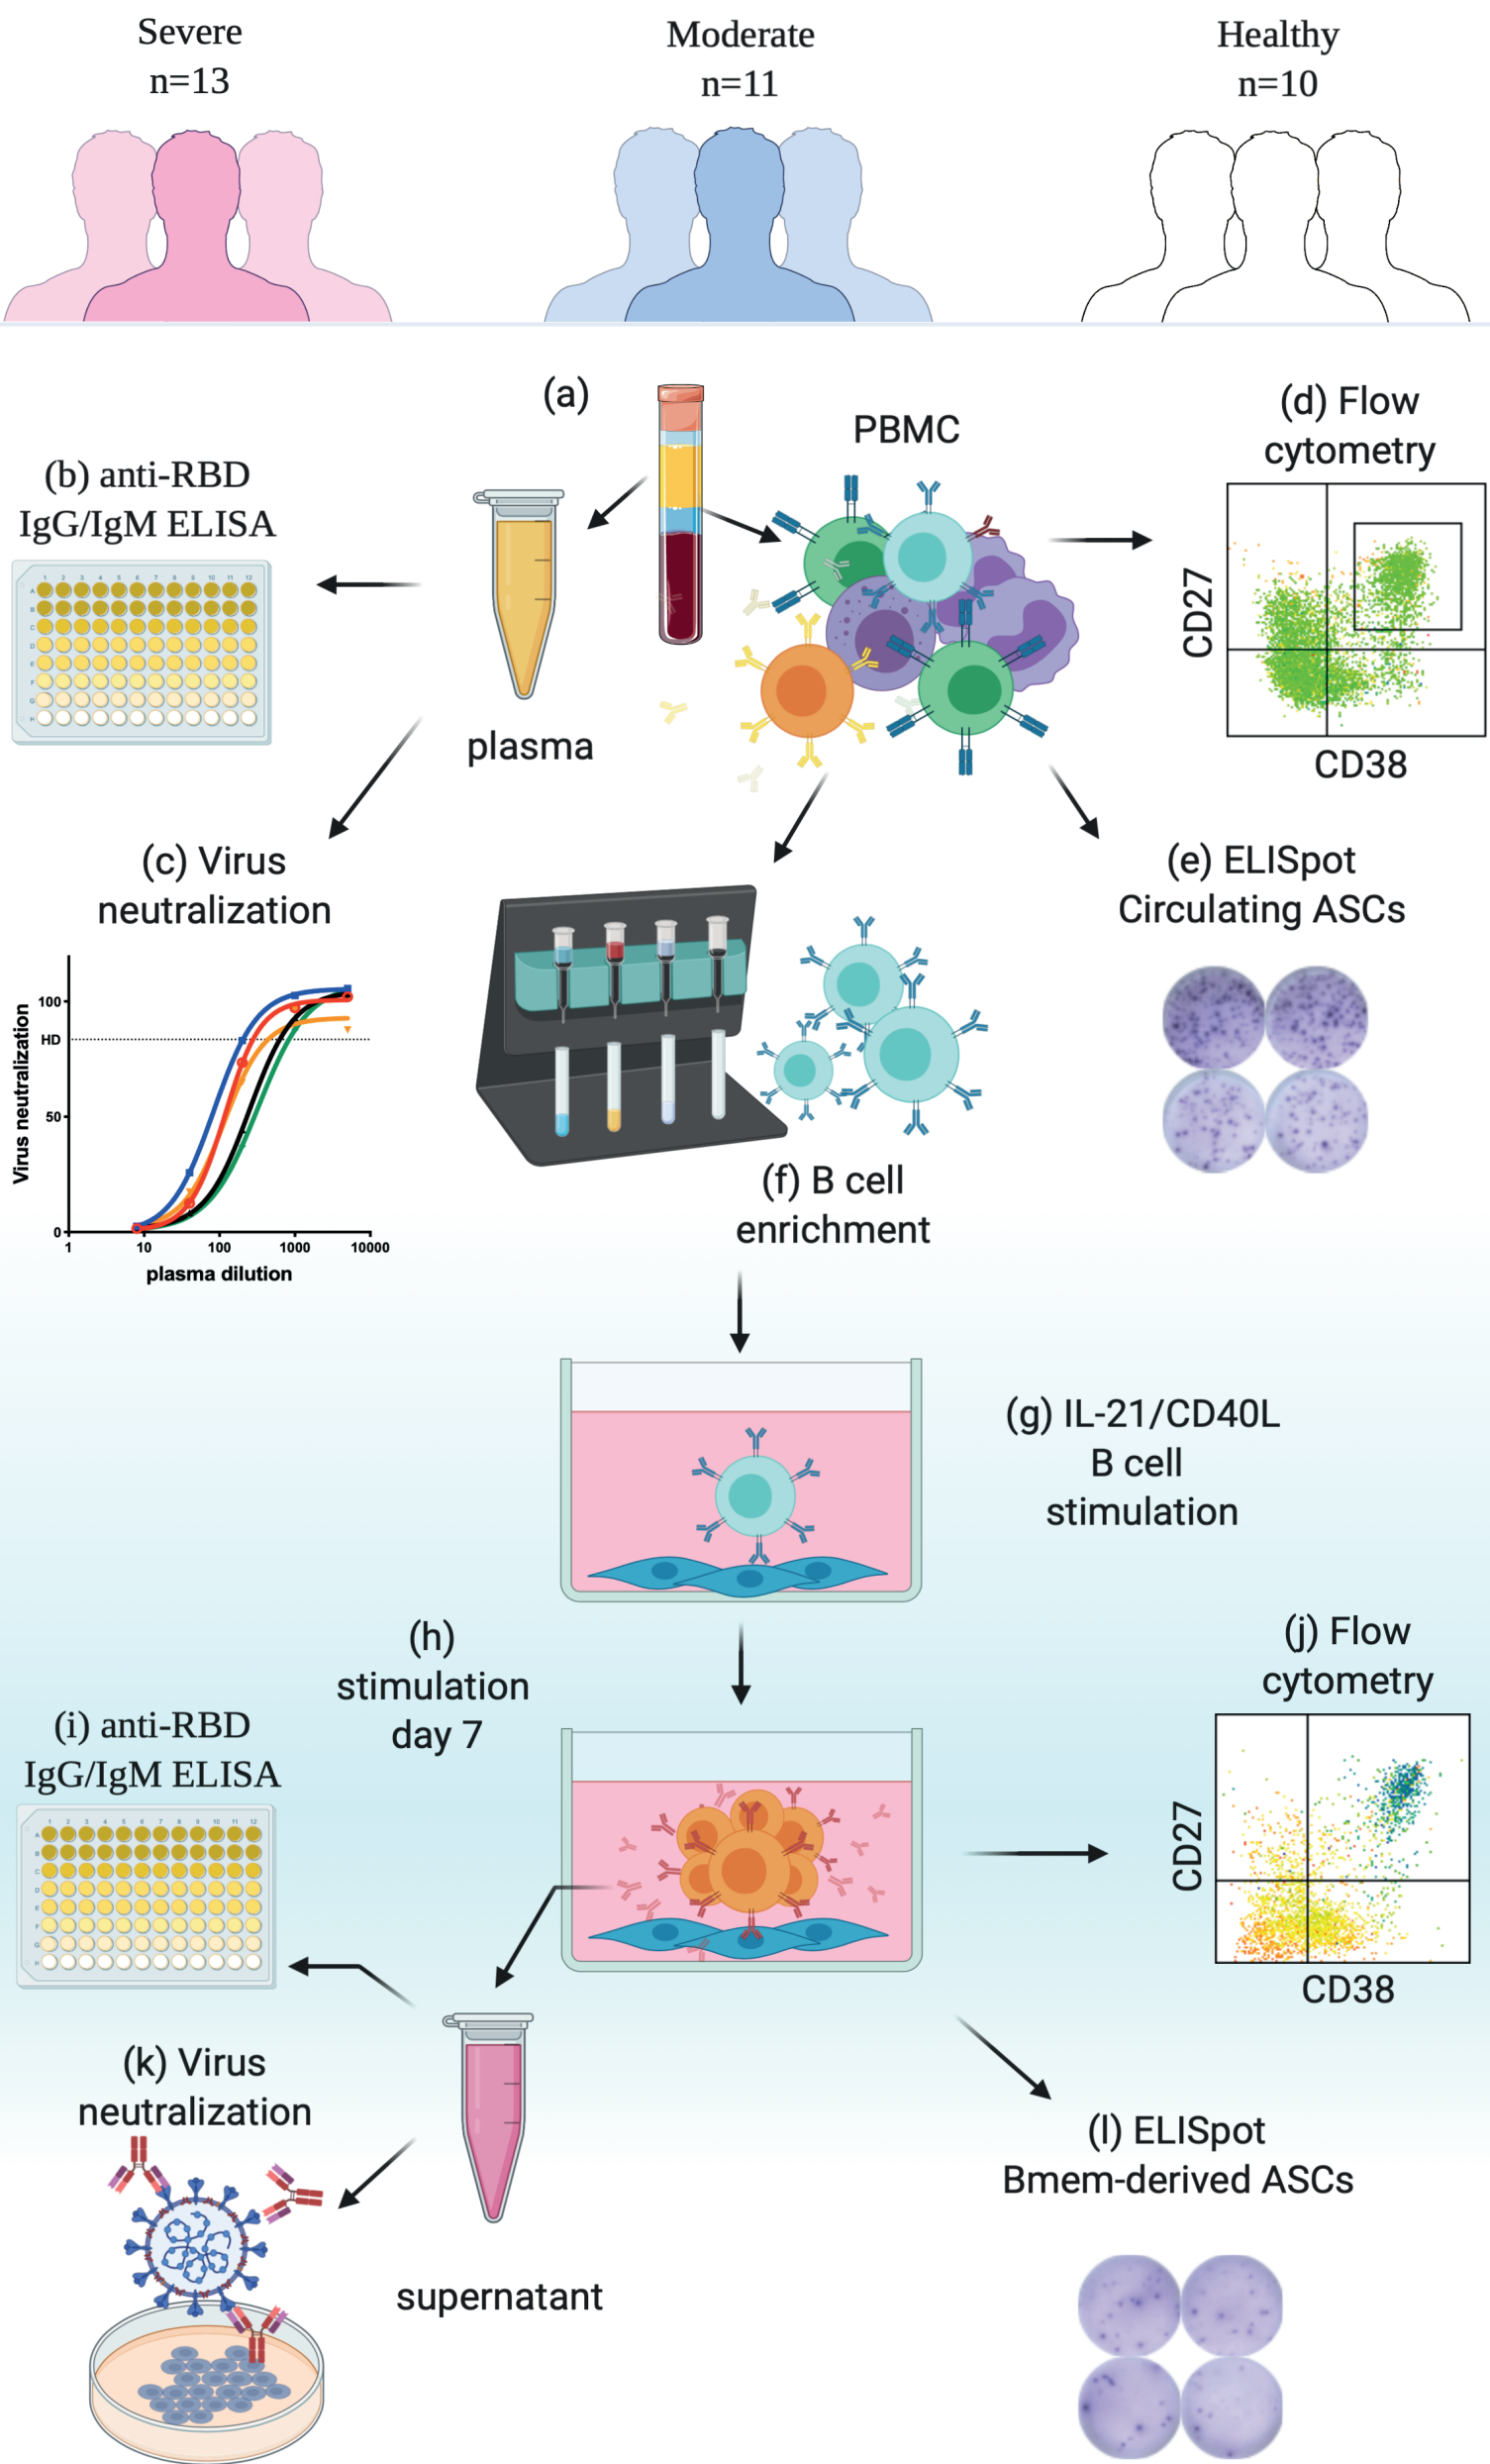

**Supplementary figure 1. Study design and analysis of B cell response in patients with acute COVID-19.** The cohorts of severe ( $n = 13$ ) and moderate ( $n = 11$ ) patients, and healthy donors ( $n = 10$ ) were included in the study. (a) Blood was collected and peripheral mononuclear cells (PBMCs) were isolated by density gradient centrifugation. Plasma samples were collected and stored at  $-80^{\circ}\text{C}$ . (b) The level of plasma antibodies against SARS-CoV-2 RBD was measured using ELISA. (c) Virus-neutralization activity of plasma was evaluated in pseudotyped virus neutralization assay. (d) The frequencies of total and RBD-binding plasmablasts in PBMC population were measured by flow cytometry. (e) Circulating RBD-specific antibody secreting cells were evaluated by ELISpot assay. (f) B cells were purified from PBMCs using immunomagnetic cell separation. (g) To stimulate the differentiation of Bmem cells into ASCs, purified B lymphocytes were stimulated using A549-CD40L feeder cells in the presence of  $25\text{ ng mL}^{-1}$  IL-21 for 7 days. (h) After stimulation for 7 days, (i) the concentration of secreted IgM or IgG in the culture supernatants of IL-21/CD40L-stimulated B cells was quantified using ELISA. (j) The generation of total and RBD-binding plasmablasts were measured by flow cytometry. (k) The supernatants from the cultures of stimulated B cells were analyzed in a neutralization assay using HIV-1-based virions pseudotyped with spike proteins of SARS-CoV-2. (l) Bmem-derived RBD-specific antibody secreting cells were evaluated by ELISpot. Illustration was created with BioRender.

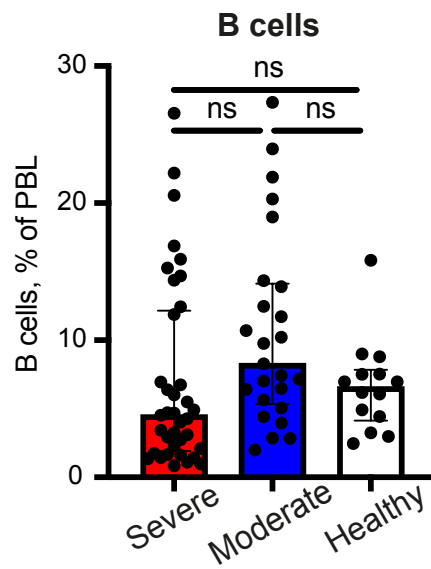

**Supplementary figure 2. The frequencies of total CD19<sup>+</sup> B cells did not change significantly in patients with COVID-19 compared to those of healthy donors. Results are shown for individual samples (symbols) from HDs (n = 12), moderate (n = 25), and severe (n = 38) COVID-19 cases.**

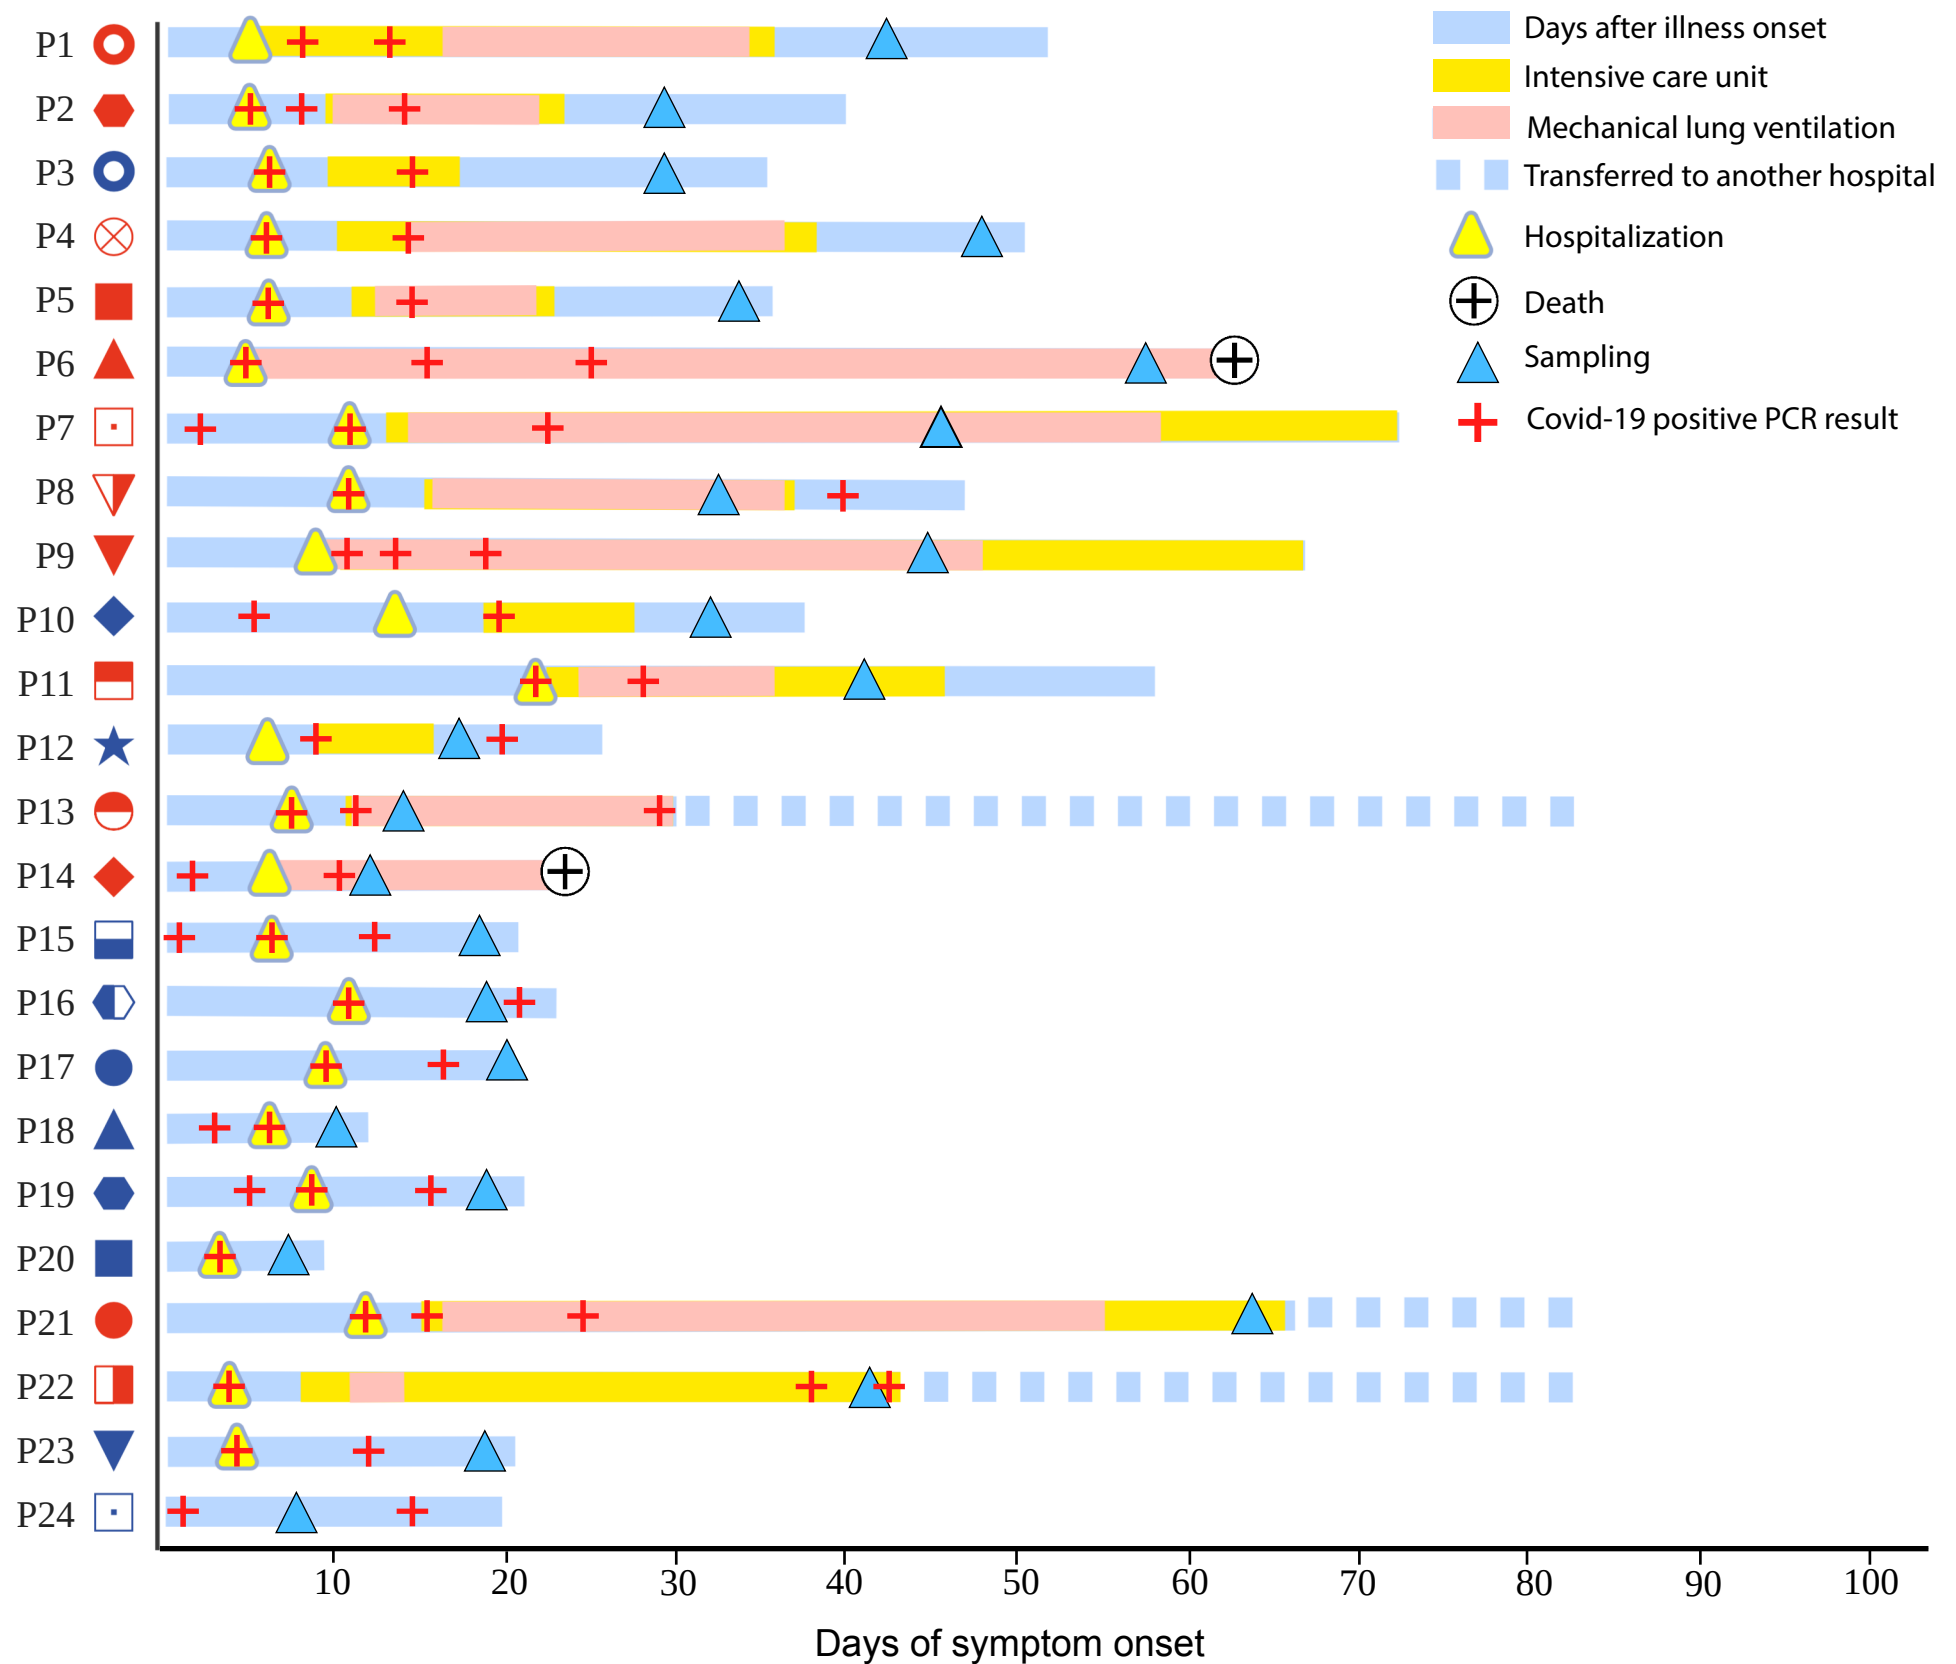

**Supplementary figure 3. Swimmer plot of 24 patients with COVID-19.** The study group included 11 patients with the moderate form (blue symbols) and 13 patients with the severe form (red symbols) of COVID-19. Patient numbers and corresponding symbols are indicated on the left of the Y-axis.

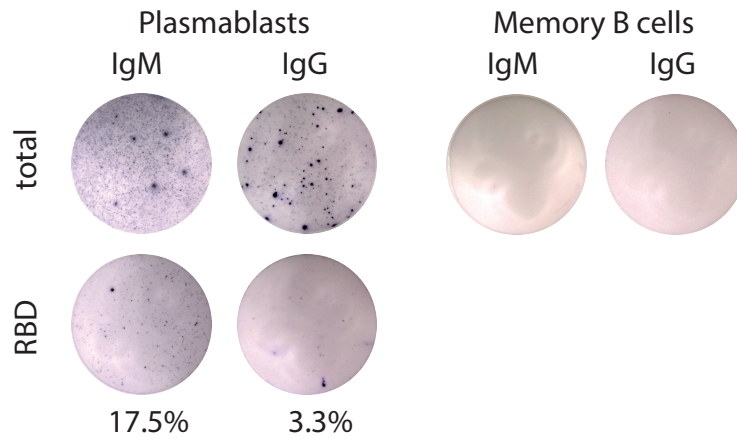

**Supplementary figure 4. Preliminary experiment, which showed that spontaneous ASCs were detected in the plasmablast population, but not in the unstimulated Bmem cell population.** Plasmablasts ( $CD19^+CD27^{hi}CD38^{hi}$ ) (two left columns) and Bmem cells ( $CD19^+CD27^+CD38^-$ ) (two right columns) were sorted separately by flow cytometry and their capacity to secrete total (top row) or RBD-specific (bottom row) IgM or IgG antibodies were determined. The percentages indicated beside the wells represent the frequencies of antigen-specific ASCs relative to the total number of IgMs or IgGs.

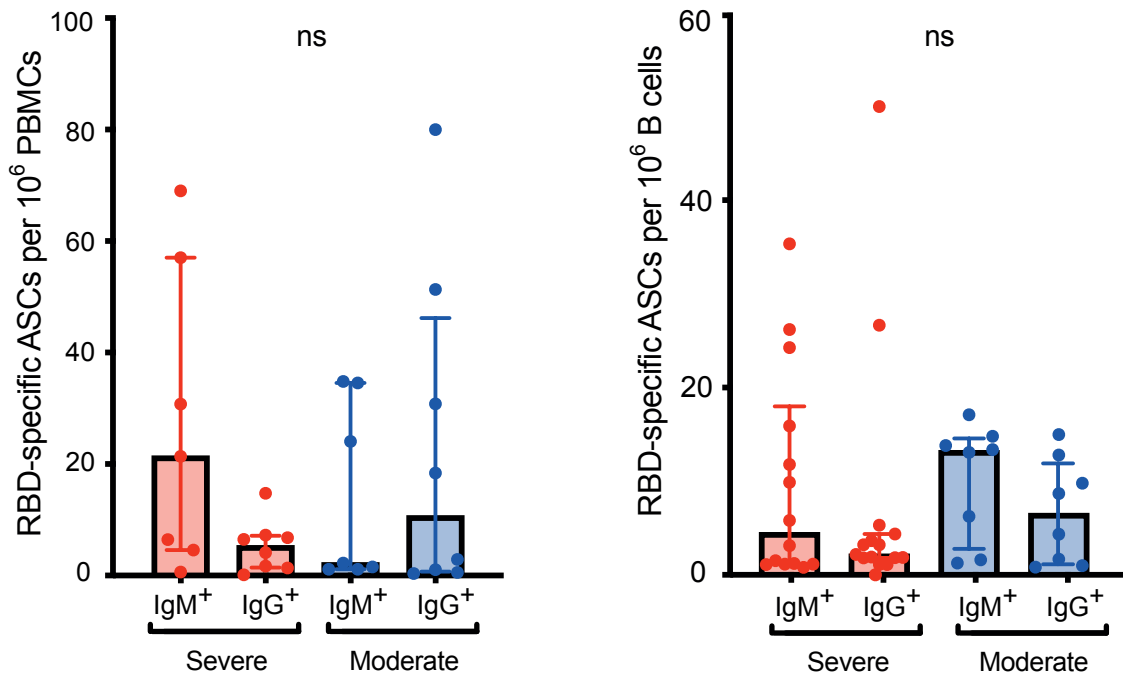

**Supplementary figure 5. The percentage of total IgM or IgG-secreting cells that were RBD-specific in patients with severe and moderate COVID-19. ELISpot assay of circulating ASCs (left panel) or Bmem cell-derived ASCs (right panel).**

(a)

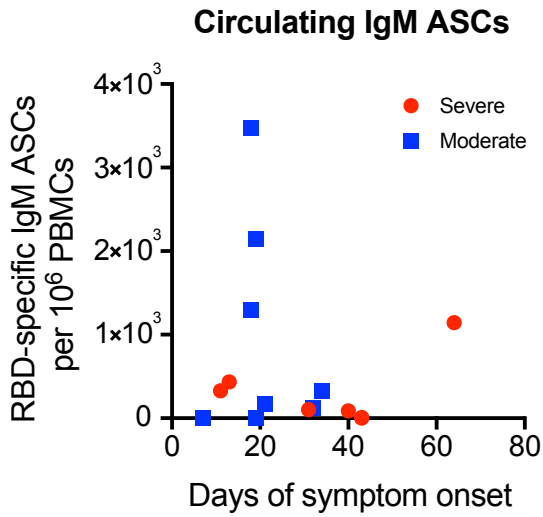

(b)

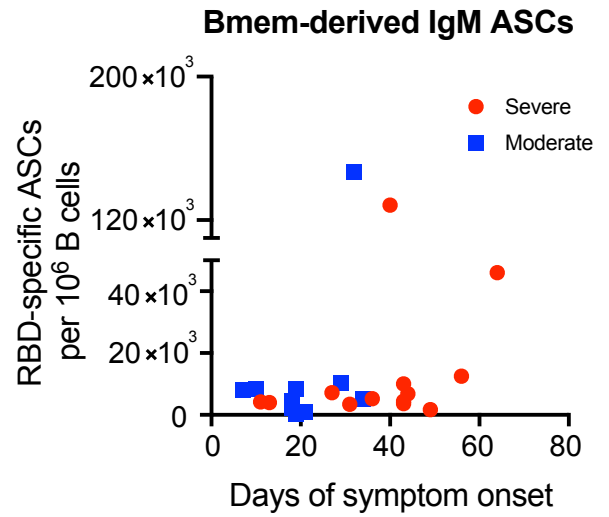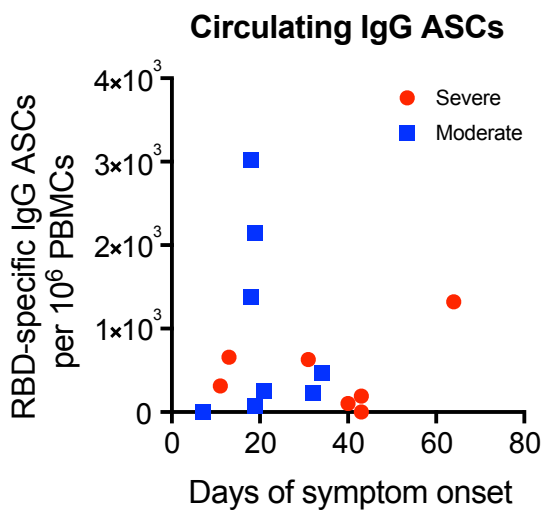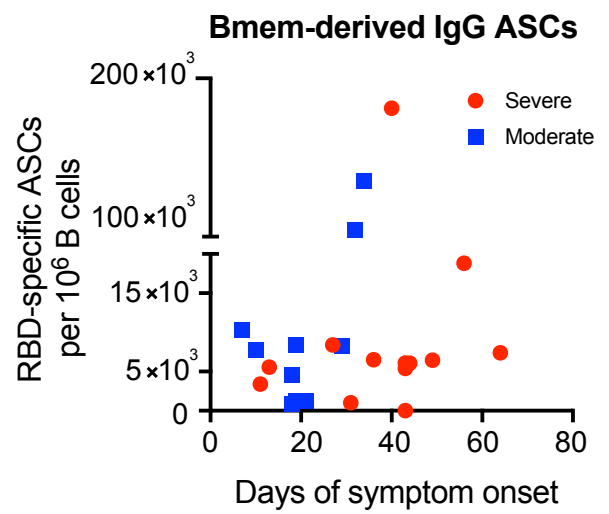

**Supplementary figure 6. Dynamic changes in RBD-specific ASCs based on the number of days after symptom onset.** (a) RBD-specific circulating ASC IgMs (top panel) or IgGs (bottom panel) collected from 15 patients with COVID-19 determined using the ELISpot assay. (b) RBD-specific Bmem cell-derived ASC IgMs (top panel) or IgGs (bottom panel) collected from 23 patients with COVID-19 determined using the ELISpot assay.

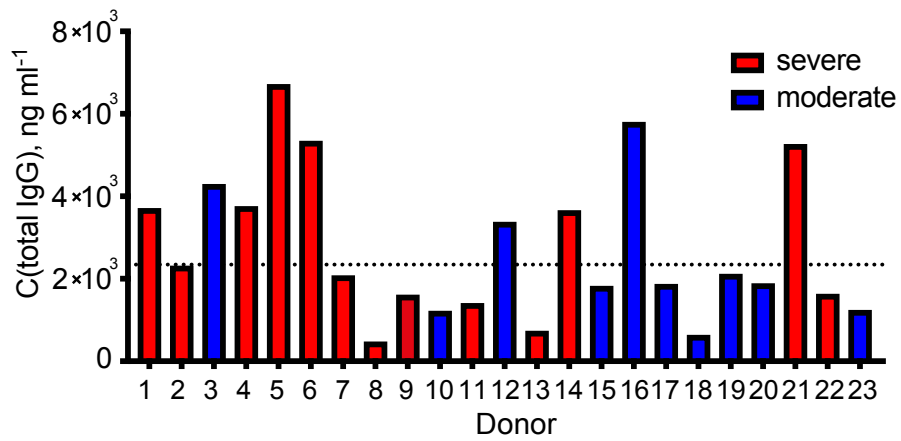

**Supplementary figure 7. Production of total IgGs in cultures of IL-21/CD40L-stimulated B cells obtained from different patients with COVID-19 evaluated using ELISA.** Results from three independent experiments. The dotted line indicates the mean level of total IgGs observed in the HD group.

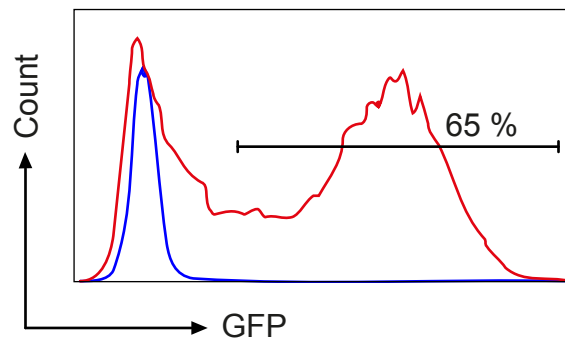

**Supplementary figure 8. Infection of ACE2-expressing HEK293T cells measured with lentiviral particles (VLP) pseudotyped with protein S from SARS-Cov-2.VLP infected approximately 50% of cells based on GFP expression (red line), the human monoclonal antibody 34B12 against RBD domain at a concentration of  $60 \text{ ng ml}^{-1}$  completely blocked SARS-Cov-2 infection (blue line). Representative plot from three independent experiments.**



**Supplementary table 1. Participant characteristics.**

|                                                            | Severe patients<br>(n = 43)         | Moderate patients<br>(n = 28)         | Healthy donors<br>(n = 14)          |
|------------------------------------------------------------|-------------------------------------|---------------------------------------|-------------------------------------|
| <b>Age</b>                                                 | median = 65<br>min = 35<br>max = 93 | median = 58.5<br>min = 24<br>max = 84 | median = 59<br>min = 45<br>max = 73 |
| <b>Sex</b>                                                 |                                     |                                       |                                     |
| Female                                                     | 21 (48.8%)                          | 11 (39.3%)                            | 7 (50%)                             |
| Male                                                       | 22 (51.2%)                          | 17 (60.7%)                            | 7 (50%)                             |
| <b>Days since onset of symptoms to the hospitalization</b> | median=6                            | median=7                              | 0                                   |
| <b>Comorbidity</b>                                         |                                     |                                       |                                     |
| Hypertension                                               | 27 (62.8%)                          | 15 (53.6%)                            | 8 (57.1%)                           |
| Diabetes                                                   | 13 (30.2%)                          | 3 (10.7%)                             | 0                                   |
| Obesity                                                    | 3 (7%)                              | 4 (14.3%)                             | 0                                   |
| Coronary artery disease/myocardial infarction              | 11 (25.6%)                          | 2 (7.1%)                              | 1 (7.1%)                            |
| <b>Length of stay in ICU<sup>§</sup></b>                   | median = 29                         | median = 7                            | 0                                   |
| <b>Mechanical ventilation</b>                              | 60.0%                               | 0%                                    | 0%                                  |
| <b>NIV/HFNC<sup>§§</sup></b>                               | 22.2%                               | 0%                                    | 0%                                  |
| <b>Total duration of mechanical ventilation</b>            | median = 11<br>min = 2<br>max = 62  | 0                                     | 0                                   |
| <b>Hospital mortality</b>                                  | 37.2%                               | 0%                                    | 0%                                  |

<sup>§</sup> intensive care unit

<sup>§§</sup> non-invasive ventilation or high-flow nasal cannula oxygen therapy
